# Supplementary material
Source: HighWire-hosted journal article supplement (https://erj.ersjournals.com/content/59/2/2102818)

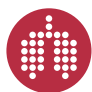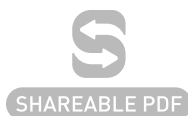

# ORF8/ORF8a: a difference between SARS-CoV-2 and SARS-CoV

Milad Zandi <sup>1,2</sup>

<sup>1</sup>Dept of Virology, School of Public Health, Tehran University of Medical Sciences, Tehran, Iran. <sup>2</sup>Research Center for Clinical Virology, Tehran University of Medical Sciences, Tehran, Iran.

Corresponding author: Milad Zandi ([Miladzandi416@gmail.com](mailto:Miladzandi416@gmail.com))

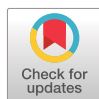

Shareable abstract (@ERSpublications)

**ORF8 as an accessory protein of SARS-CoV-2** <https://bit.ly/3Gr3OTK>

**Cite this article as:** Zandi M. ORF8/ORF8a: a difference between SARS-CoV-2 and SARS-CoV. *Eur Respir J* 2022; 59: 2102818 [DOI: 10.1183/13993003.02818-2021].

This single-page version can be shared freely online.

Copyright ©The authors 2022.

This version is distributed under the terms of the Creative Commons Attribution Non-Commercial Licence 4.0. For commercial reproduction rights and permissions contact [permissions@ersnet.org](mailto:permissions@ersnet.org)

Received: 29 Oct 2021  
Accepted: 29 Nov 2021

*To the Editor:*

Recently in an editorial published as an “early view” paper in the *European Respiratory Journal*, Hartsell *et al.* [1] reported that ORF8a has a role in SARS-CoV-2 infection. In figure 1, it was stated that ORF7a, ORF8a and ORF9b locate within the mitochondria and can inhibit RIG1-MAVS (retinoic acid-inducible gene I-mitochondrial antiviral signalling protein)-dependent interferon signalling, enhance viral replication and disrupt mitochondrial function [1], although based on scientific evidence, SARS-CoV-2 lacks ORF8a [2–4].

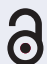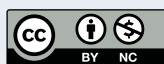

Supplement: inline-supplementary-material-1 [file inline-supplementary-material-1.pdf]
